# Supplementary material for: Identification of Cardiac Glycosides as Novel Inhibitors of eIF4A1-Mediated Translation in Triple-Negative Breast Cancer Cells
Source: MDPI journal article supplement (doi:10.3390/cancers12082169), 2020-08-04

Figure 3E

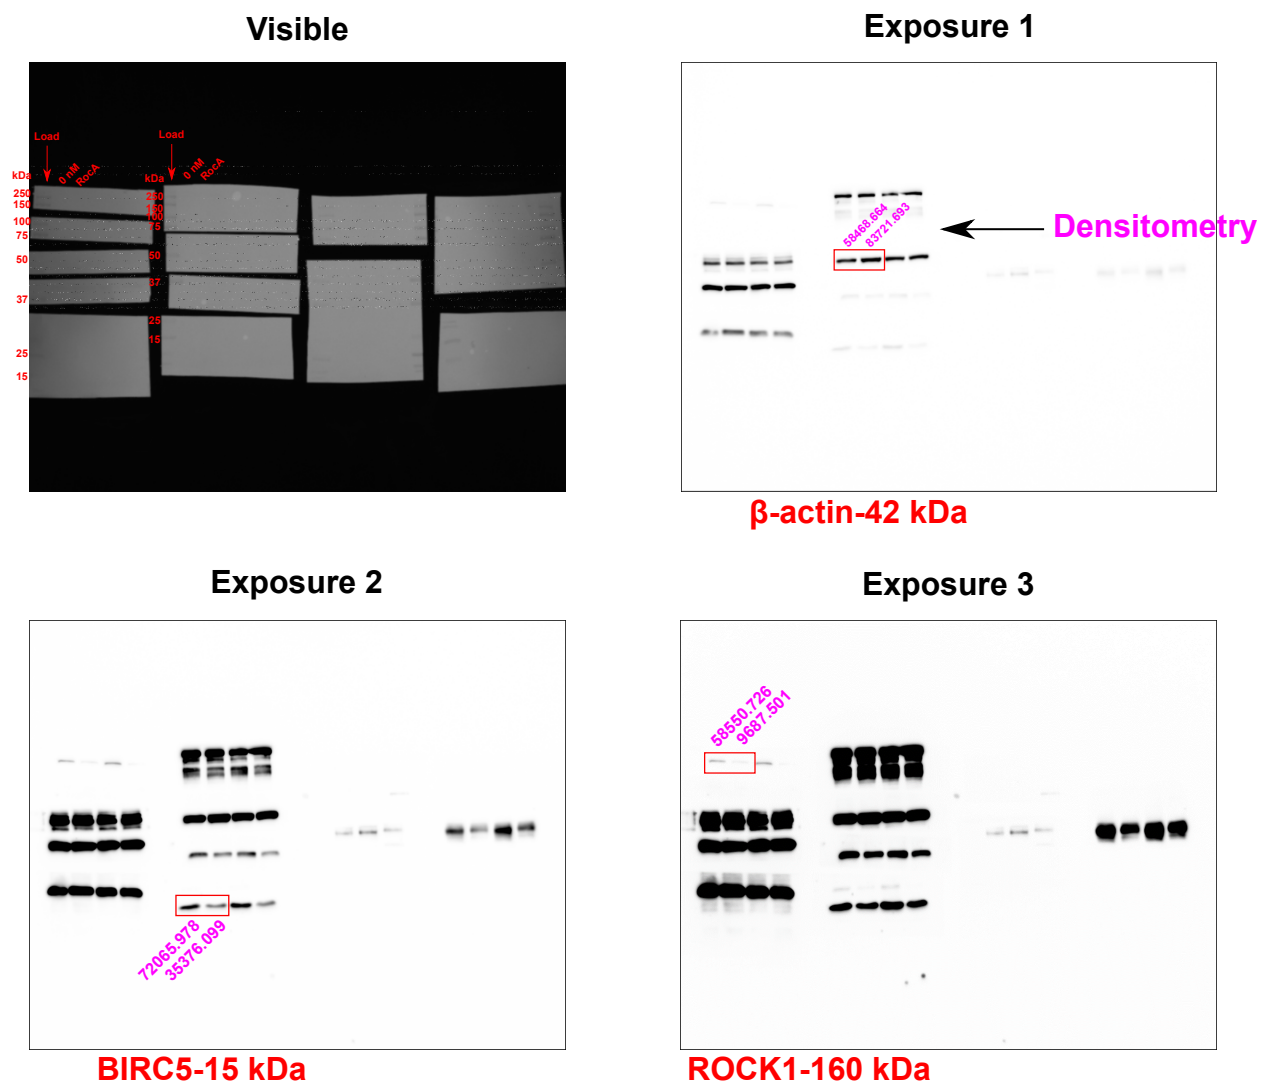

Figure 3F

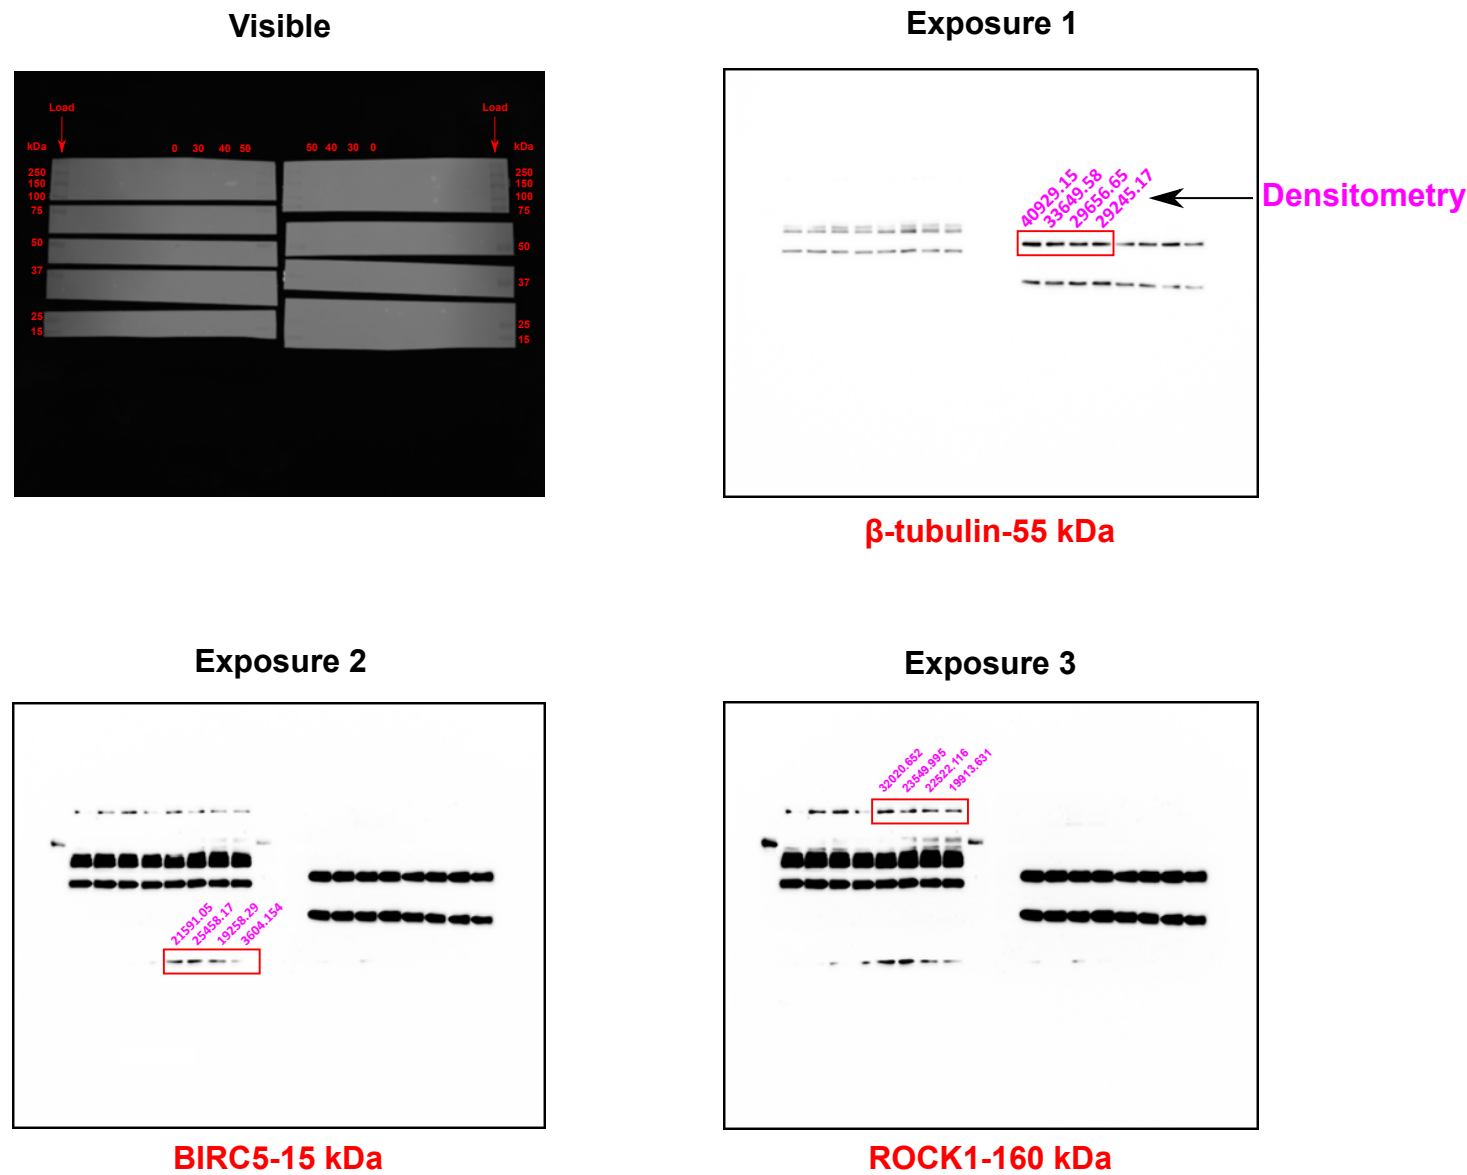

Figure 3G

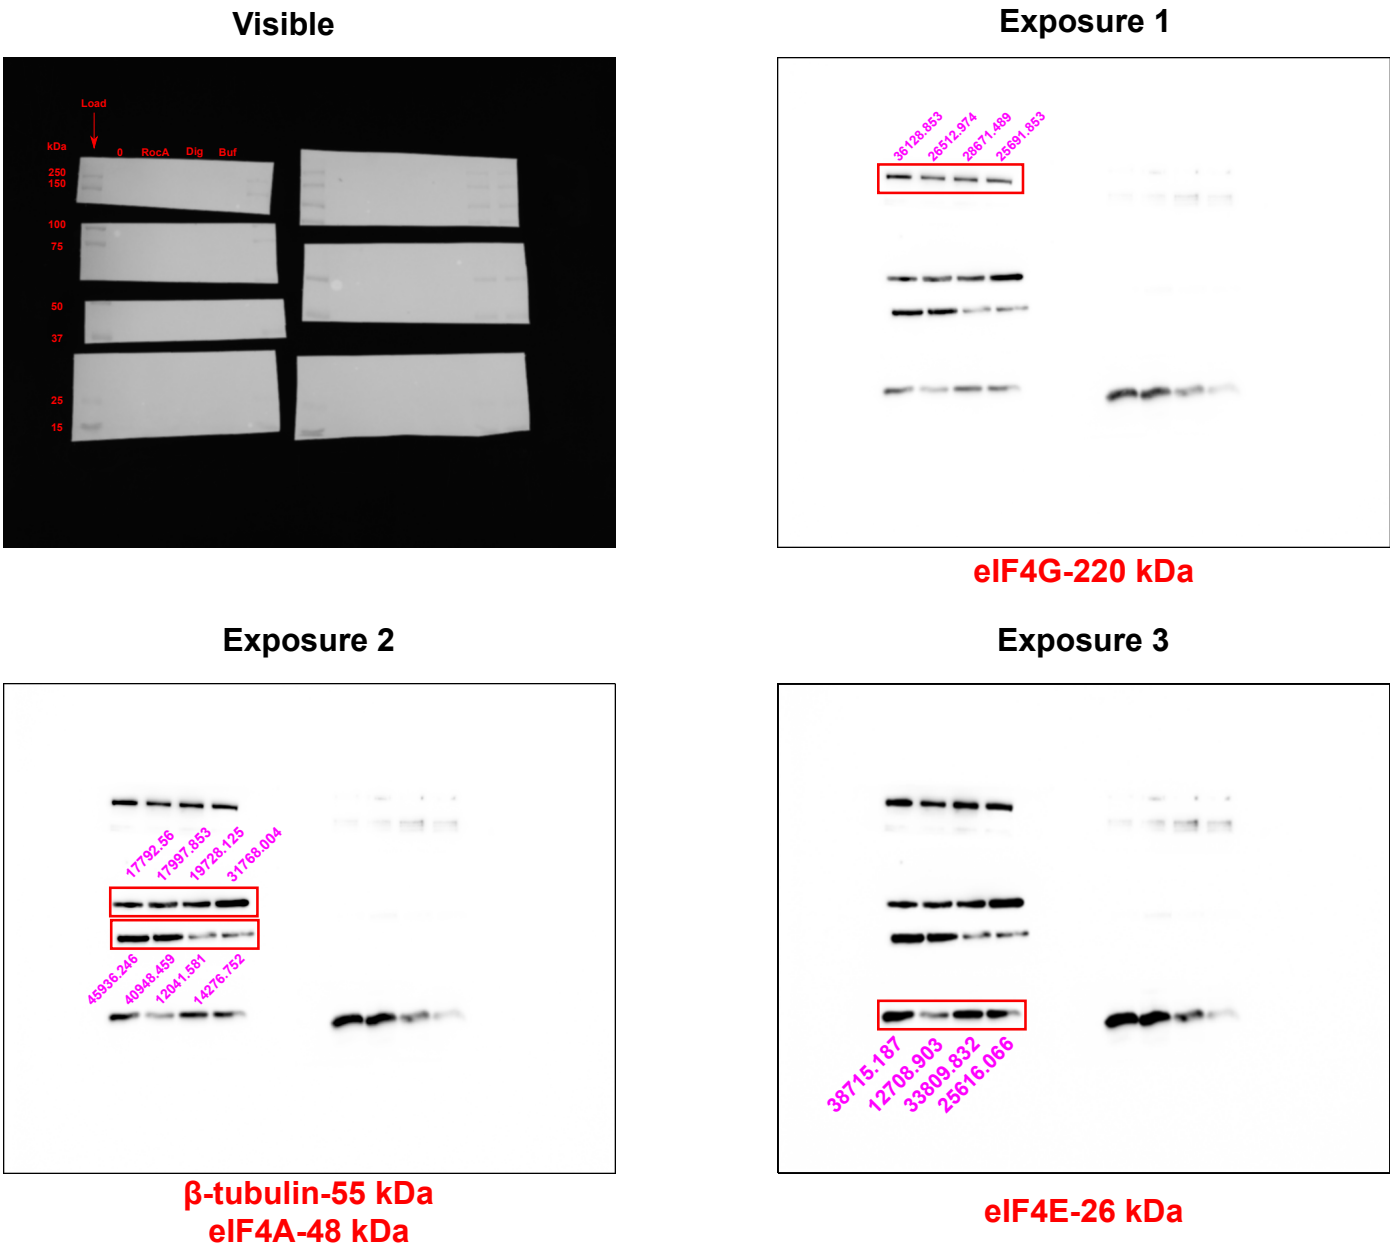

Figure 4A

Visible

Exposure 1

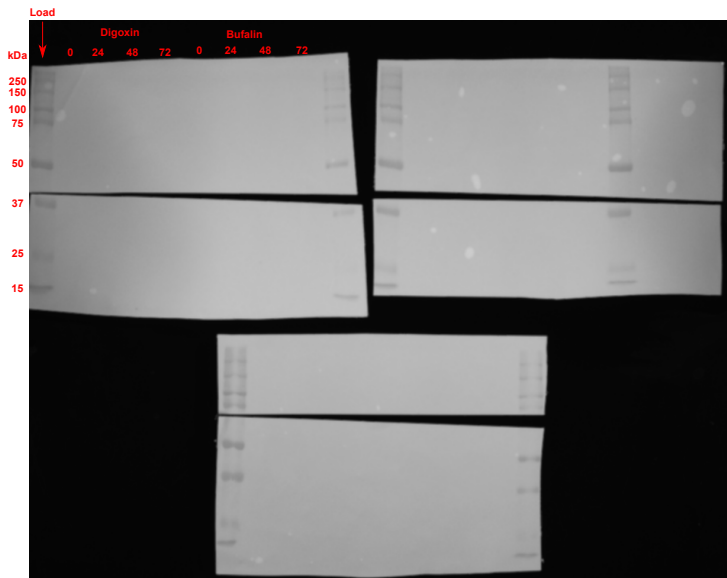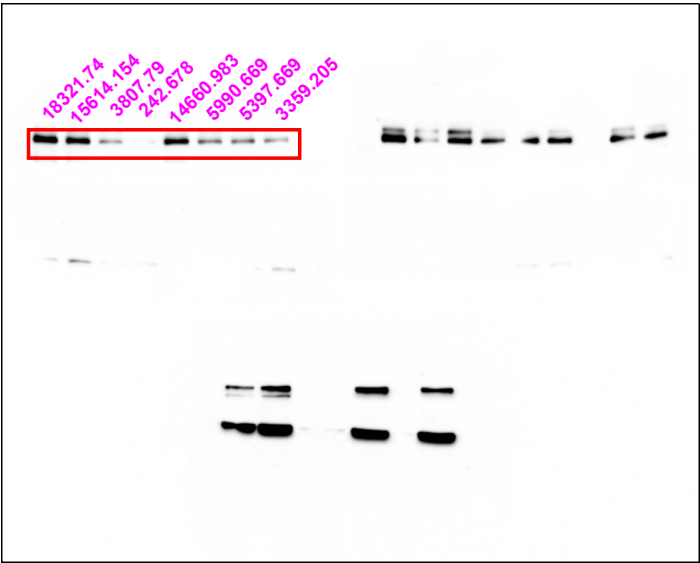

c-MYC-58 kDa

Visible

Exposure 1

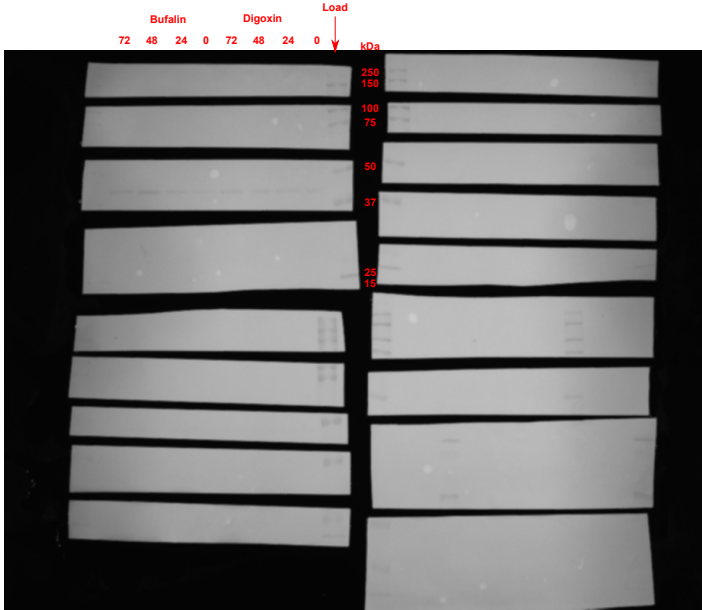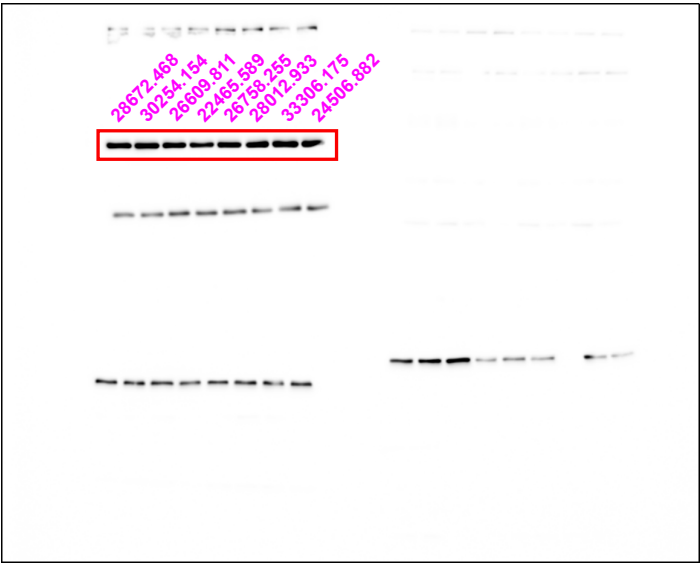

$\beta$ -actin-42 kDa

Figure 4B

Visible

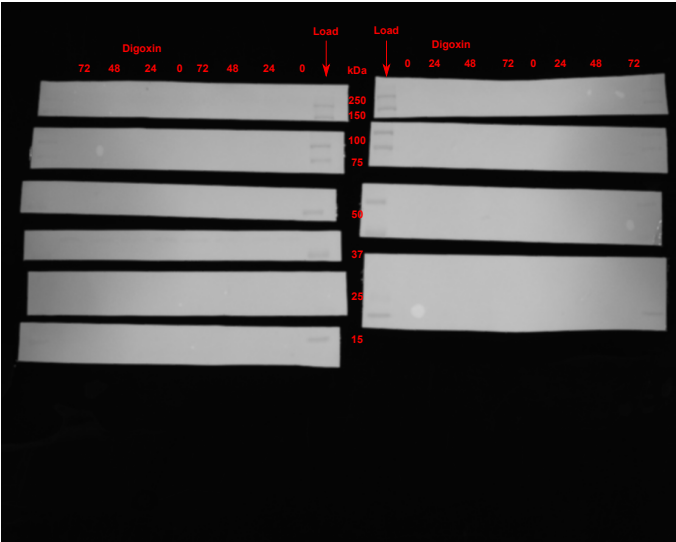

Exposure 1

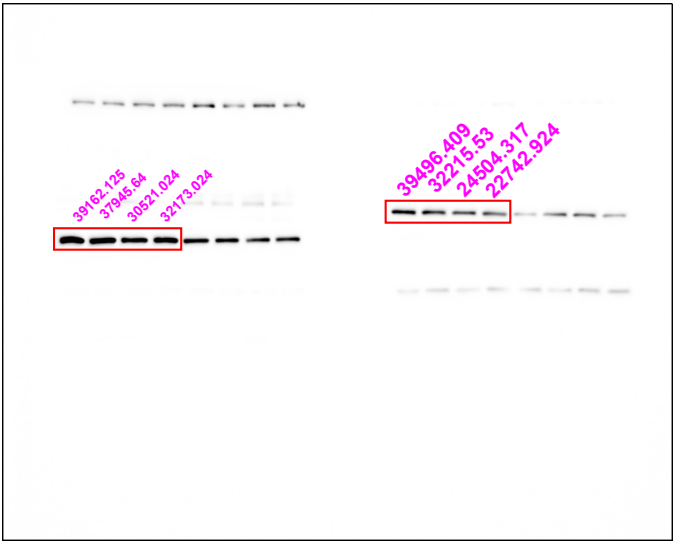

**β-actin-42 kDa** **eIF4A-48 kDa**

Exposure 2

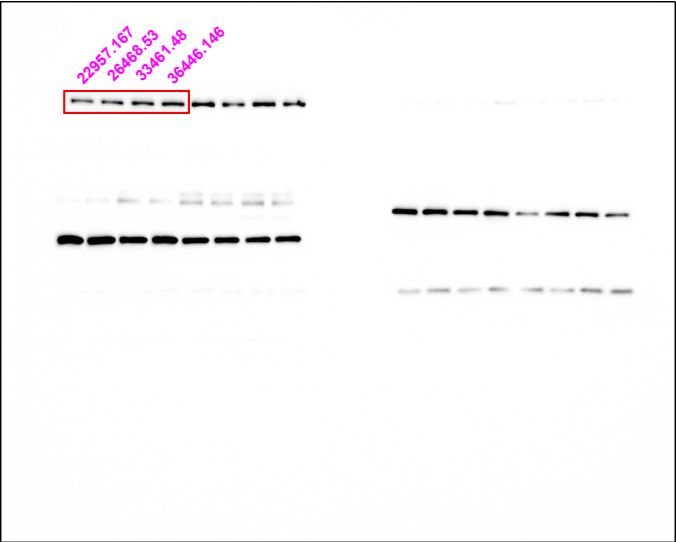

**eIF4G-220 kDa**

Exposure 3

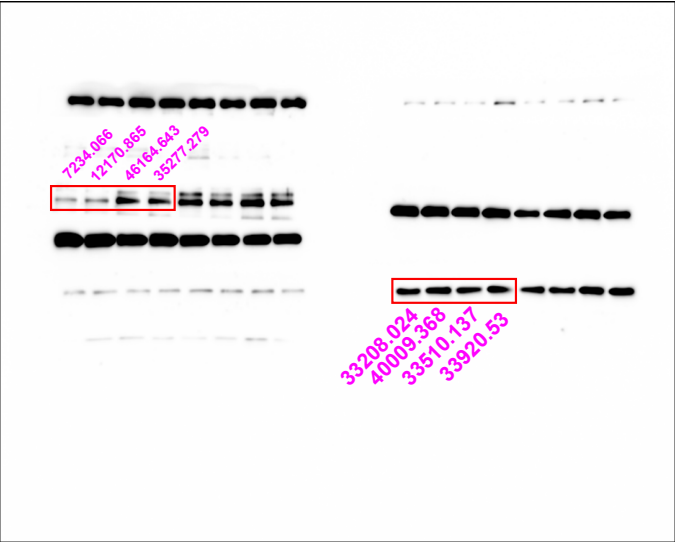

**c-MYC-55 kDa** **eIF4E-26 kDa**

Exposure 4

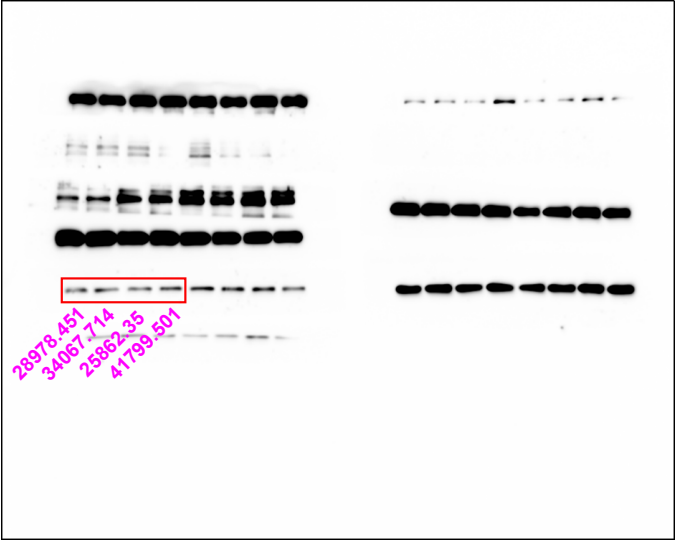

**CCND3-31 kDa**

Exposure 5

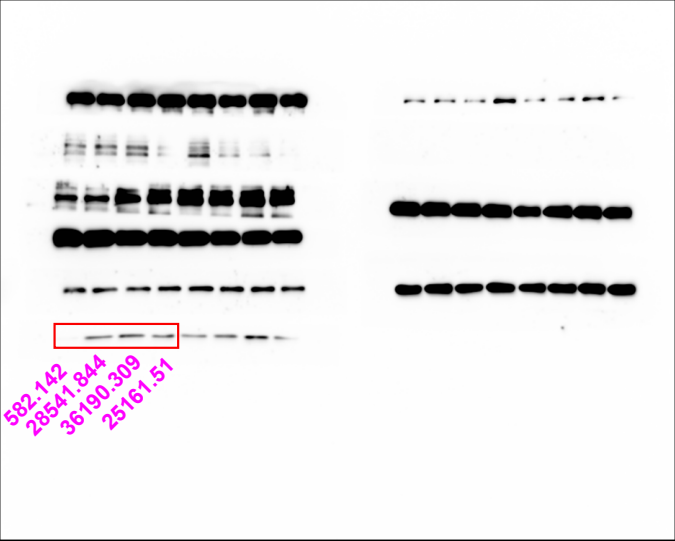

**BIRC5-15 kDa**

Figure 5D

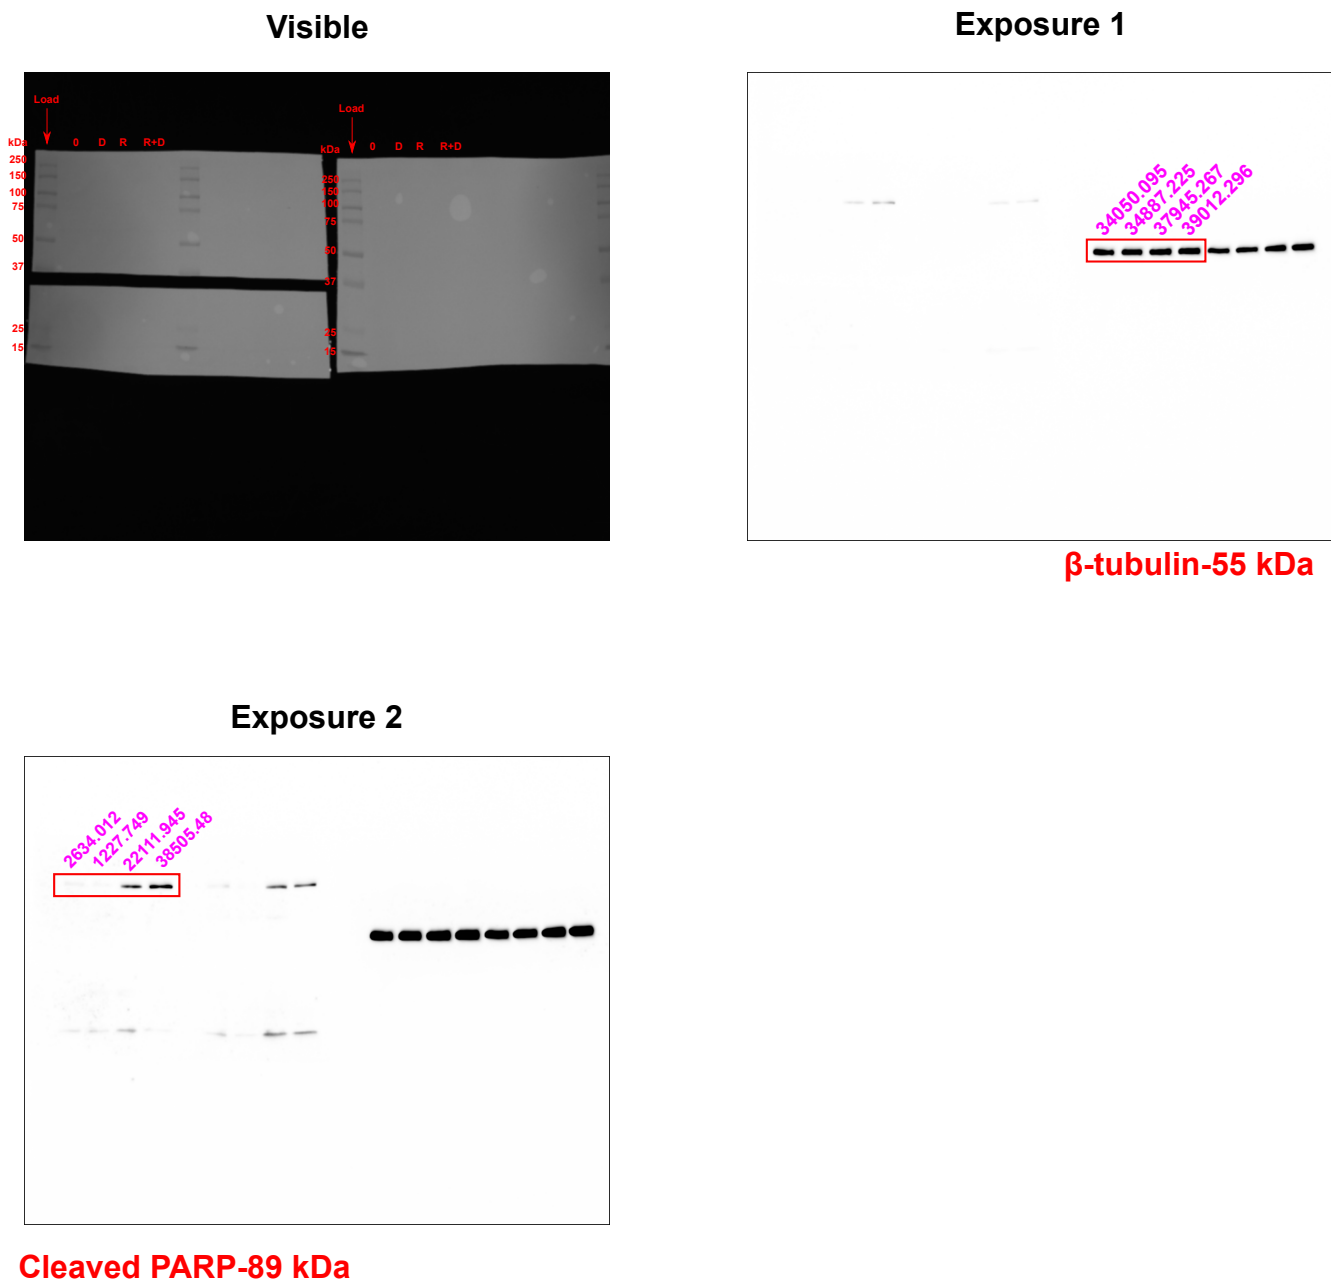

Supplement: s1 [file s1]
